# Supplementary material for: Regulatory Mechanisms of Epigenetic miRNA Relationships in Human Cancer and Potential as Therapeutic Targets
Source: PubMed Central journal article supplement (PMC7600069; doi:10.3390/cancers12102922), 2020-10-11
Supplement: cancers-12-02922-s001.pdf [file cancers-12-02922-s001.pdf]

# Regulatory Mechanisms of Epigenetic miRNA Relationships in Human Cancer and Potential as Therapeutic Targets

K.M. Taufiqul Arif, Esther K. Elliott, Larisa M. Haupt and Lyn R. Griffiths

**Table S1.** Epigenetic regulation of miRNAs in leukaemia and lymphomas.

| Cancer/Condition              | Epi Modification      | Epi Regulator    | miRNA                                                                                                                                                                                                                                                                                                                                                                                                                             | Level of Expression | Ref (Pubmed ID) |
|-------------------------------|-----------------------|------------------|-----------------------------------------------------------------------------------------------------------------------------------------------------------------------------------------------------------------------------------------------------------------------------------------------------------------------------------------------------------------------------------------------------------------------------------|---------------------|-----------------|
| Acute Lymphoblastic leukaemia | DNA Methylation       | DNMTs            | miR-22                                                                                                                                                                                                                                                                                                                                                                                                                            | Low                 | 19807731        |
|                               | Histone Acetylation   | HDACs            | miR-141, miR-151a-5p, miR-15a, miR-181a-2, miR-181d, miR-185, miR-18a-3p, miR-192, miR-194-1, miR-196a-3p, miR-215, miR-26a-2-3p, miR-27a, miR-28-5p, miR-29a-5p, miR-29c, miR-320a, miR-339-3p, miR-377-5p, miR-491-3p, miR-500a, miR-502-3p, miR-509-3-5p, miR-550a-3p, miR-589, miR-769-5p, miR-887, miR-9-3p, miR-106b, miR-181c, miR-191, miR-24-2-5p, miR-29b-3p, miR-30c-2, miR-552, miR-574-3p, miR-923, miR-937, miR-205 |                     |                 |
|                               | H3K27me3/H3ac         | -                | miR-22                                                                                                                                                                                                                                                                                                                                                                                                                            | High                |                 |
|                               | DNA Methylation       | -                | miR-9-1                                                                                                                                                                                                                                                                                                                                                                                                                           | Low                 | 21810092        |
|                               | DNA Methylation       | DNMTs            | miR-124-1, miR-124-2, miR-124-3, miR-34b, miR-34c, miR-9-1, miR-9-3, miR-10b, miR-203a, miR-196b, miR-9-2, miR-132, miR-212                                                                                                                                                                                                                                                                                                       | Low                 | 19164206        |
|                               | H3K9me2/H3K4me3       | -                | miR-9-1, miR-9-2, miR-9-3, miR-10b, miR-34b, miR-34c, miR-124-1, miR-124-2, miR-124-3, miR-132, miR-196b, miR-203a, miR-212                                                                                                                                                                                                                                                                                                       |                     |                 |
|                               | DNA Methylation       | DNMTs            | miR-124-3p                                                                                                                                                                                                                                                                                                                                                                                                                        | High                | 19435910        |
|                               | H3K9me3/H3K27me3/H3ac | -                |                                                                                                                                                                                                                                                                                                                                                                                                                                   |                     |                 |
| DNA Methylation               | -                     | miR-196b         | Low                                                                                                                                                                                                                                                                                                                                                                                                                               | 20494936            |                 |
| Acute myeloid leukaemia       | DNA Methylation       | DNMT-1/MLL       | miR-486, miR-424, miR-148a, miR-101-3p                                                                                                                                                                                                                                                                                                                                                                                            | Low                 | 21116279        |
|                               |                       |                  | miR-200b, miR-200a, miR-429, miR-152, miR-10a, miR-503, miR-432                                                                                                                                                                                                                                                                                                                                                                   | High                |                 |
|                               |                       | AML1/ETO protein | miR-193a                                                                                                                                                                                                                                                                                                                                                                                                                          | High                | 23223432        |
|                               |                       |                  | miR-370                                                                                                                                                                                                                                                                                                                                                                                                                           | Low                 | 22900969        |
|                               | DNA Methylation       | DNMTs            | miR-193a                                                                                                                                                                                                                                                                                                                                                                                                                          | High                | 21399664        |
|                               |                       |                  | miR-34b, miR-34c                                                                                                                                                                                                                                                                                                                                                                                                                  | High                | 19258499        |
| Aggressive B-cell lymphoma    |                       |                  | miR-124-3p                                                                                                                                                                                                                                                                                                                                                                                                                        | High                | 18451139        |
|                               | H4ac/H3K27me3         | MYC/HDAC3/EZH2   | miR-29a                                                                                                                                                                                                                                                                                                                                                                                                                           | High                | 23079660        |
| Burkitt lymphoma              | DNA Methylation       | -                | miR-9-1                                                                                                                                                                                                                                                                                                                                                                                                                           | Low                 | 20930934        |
|                               | DNA Methylation       | DNMTs            | miR-129-2                                                                                                                                                                                                                                                                                                                                                                                                                         | High                | 23406679        |

|                                                   |                 |                                                     |                                                                                                                                         |      |          |
|---------------------------------------------------|-----------------|-----------------------------------------------------|-----------------------------------------------------------------------------------------------------------------------------------------|------|----------|
| Haematological malignancy                         | DNA Methylation | DNMTs                                               | miR-124-1                                                                                                                               | High | 21544199 |
|                                                   | H3K4me3         | -                                                   |                                                                                                                                         | Low  |          |
|                                                   | DNA Methylation | DNMTs                                               | miR-203a                                                                                                                                | High |          |
| Leukaemia                                         | DNA Methylation | DNMTs                                               | miR-34a                                                                                                                                 | High | 20118199 |
|                                                   | DNA Methylation | -                                                   | miR-124-3p                                                                                                                              | low  | 22541098 |
|                                                   | DNA Methylation | DNMTs                                               | miR-143                                                                                                                                 | High | 21706045 |
|                                                   | DNA Methylation | DNMTs                                               | miR-1202, miR-1228, miR-149, miR-1225, miR-339-3p, miR-210, miR-502-3p, miR-126, miR-150, miR-943, miR-1255a, miR-195, miR-493, miR-223 | Low  | 21518471 |
|                                                   | DNA Methylation | DNMTs                                               | miR-203a                                                                                                                                | High | 18538733 |
|                                                   | DNA Methylation | AML1-ETO<br>H3ac/H4ac oncoprotein/HDAC1/DNMTs/MeCP2 | miR-223                                                                                                                                 | High | 17996649 |
| Mantle cell lymphoma                              | H4ac            | HDAC3/Myc                                           | miR-15a                                                                                                                                 | High | 22002311 |
|                                                   | H5ac            | HDAC3/Myc                                           | miR-16-1                                                                                                                                | High | 22002312 |
| Mixed lineage leukemia-rearranged acute leukemias | H3ac/H3K4me3    | MLL fusion proteins                                 | miR-17, miR-18a, miR-19a, miR-20a, miR-19b-1, miR-92a-1                                                                                 | High | 20133587 |
| NK-T cell lymphoma                                | DNA Methylation | DNMTs                                               | miR-146a                                                                                                                                | High | 21610143 |
| T-cell leukaemia                                  | H3K9me/H3K27me  | PRC2                                                | miR-31                                                                                                                                  | High | 22264793 |

Table S2. Epigenetic regulations of miRNAs in solid cancers.

| Cancer/Condition | Epi Modification    | Epi Regulator | miRNA                                                                                 | Level of Expression | Ref (pubmed ID) |
|------------------|---------------------|---------------|---------------------------------------------------------------------------------------|---------------------|-----------------|
| Breast           | DNA Methylation     | DNMTs         | miR-9-1                                                                               | High                | 17948228        |
|                  | DNA Methylation     | DNMTs         | miR-9-1, miR-124-3, miR-148a, miR-152, miR-663a                                       | High                | 18314617        |
|                  | DNA Methylation     | -             | miR-196a-2                                                                            | Low                 | 19567675        |
|                  | DNA Methylation     | DNMTs         | miR-200c, miR-141                                                                     | High                | 20682048        |
|                  | DNA Methylation     | -             | let-7a-3                                                                              | Low                 | 20848182        |
|                  | DNA Methylation     | -             | miR-375                                                                               | Low                 | 20978187        |
|                  | H3K9me2             | -             |                                                                                       |                     |                 |
|                  | DNA Methylation     | DNMTs         | miR-335                                                                               | High                | 21289068        |
|                  | DNA Methylation     | -             | miR-195, miR-497                                                                      | Low                 | 21350001        |
|                  | DNA Methylation     | DNMTs         | miR-125b-5p                                                                           | High                | 21444677        |
|                  | Histone Acetylation | HDACs         | miR-200a                                                                              | Low                 | 21926171        |
|                  | DNA Methylation     | DNMTs         | miR-34a, miR-125b-5p, miR-126, miR-155, miR-193b, miR-378a, miR-424, miR-494, miR-768 | Low                 | 22076154        |
|                  | DNA Methylation     | -             | miR-200a, miR-200b, miR-429                                                           | Low                 | 22231446        |

|                                      |                     |                  |                                                                                                                                                                                                                |             |          |
|--------------------------------------|---------------------|------------------|----------------------------------------------------------------------------------------------------------------------------------------------------------------------------------------------------------------|-------------|----------|
|                                      | DNA Methylation     | DNMTs            | miR-203a                                                                                                                                                                                                       | High        | 22393463 |
|                                      | DNA Methylation     | DNMT-1           | miR-148a, miR-152                                                                                                                                                                                              | High        | 22935141 |
|                                      | DNA Methylation     | -                | miR-200a, miR-200b, miR-200c, miR-141, miR-429                                                                                                                                                                 | Low         | 23112837 |
|                                      | DNA Methylation     | -                | miR-31, miR-130a, let-7a-3, let-7b, miR-155, miR-137, miR-34b, miR-34c                                                                                                                                         | Low         | 23342147 |
|                                      | DNA Methylation     | Mel-18/DNMT-1    | miR-205                                                                                                                                                                                                        | High        | 23474752 |
|                                      | DNA Methylation     | Kindlin 2/DNMT-3 | miR-200a, miR-200b, miR-429                                                                                                                                                                                    | Low         | 23483548 |
|                                      | DNA Methylation     | -                | miR-10b                                                                                                                                                                                                        | High        | 23125021 |
| Apoptosis resistant breast cancer    | Histone Acetylation | HDACs            | miR-1, miR-22, miR-139, miR-143, miR-144, miR-153, miR-155, miR-191-3p, miR-194-1, miR-215, miR-202-5p, miR-335, miR-486, miR-519c-5p, miR-544a, miR-559, miR-568, miR-620, miR-627, miR-638, miR-641, miR-888 | Low         | 21971930 |
| Breast tumour cell cycle progression | H3K4me3             | JARID1B          | let-7e                                                                                                                                                                                                         | High        | 21969366 |
| Breast tumour-initiating cells       | DNA Methylation     | sp1              | miR-34c                                                                                                                                                                                                        | Low         | 22074923 |
| Breast cancer metastasis             | DNA Methylation     | -                | miR-124-3p                                                                                                                                                                                                     | Low         | 22085528 |
| TNBC                                 | DNA Methylation     | DNMTs            | miR-31                                                                                                                                                                                                         | High        | 22289355 |
|                                      | DNA Methylation     | -                | miR-200a, miR-205                                                                                                                                                                                              | Low         | 20473948 |
|                                      | DNA Methylation     | -                | miR-34a, miR-126, miR-200b-5p, miR-516a-1, miR-551a, miR-744, miR-1226-5p, miR-24-1-5p, miR-149, miR-193a, miR-210, miR-503, miR-1227, miR-1229                                                                | Low         |          |
| Bladder                              | DNA Methylation     | DNMTs            | miR-152, miR-212, miR-328, miR-1224-3p, miR-9-3, miR-9-1, miR-9-2, miR-34b                                                                                                                                     | High        | 21138856 |
|                                      | DNA Methylation     | DNMTs            | miR-9-2                                                                                                                                                                                                        | Low         |          |
|                                      | H3K9me3             | -                | miR-193a, miR-212, miR-149, miR-328, miR-1224                                                                                                                                                                  | Low         |          |
|                                      | DNA Methylation     | DNMTs            | miR-517a                                                                                                                                                                                                       | Low         | 21479368 |
|                                      | DNA Methylation     | -                | miR-203a                                                                                                                                                                                                       | Low         | 21836020 |
|                                      | DNA Methylation     | DNMTs            | miR-9-1, miR-9-3, miR-10b, miR-34b, miR-124-1, miR-124-2, miR-124-3, miR-137, miR-200b, miR-203a, miR-409, miR-675                                                                                             | High        | 23200812 |
| Cervical                             | DNA Methylation     | DNMTs            | miR-124-3p                                                                                                                                                                                                     | High        | 20579385 |
|                                      | DNA Methylation     | -                | miR-124-3p, miR-34b, miR-203a                                                                                                                                                                                  | Low         | 21461574 |
|                                      | DNA Methylation     | -                | miR-149, miR-203a, miR-375                                                                                                                                                                                     | High        | 23324622 |
| Colon                                | DNA Methylation     | DNMTs            | miR-517b, miR-517a, miR-372, miR-519d, miR-520g, miR-373                                                                                                                                                       | Low<br>High | 21785829 |
|                                      | DNA Methylation     | -                | miR-34a, miR-34b, miR-34c                                                                                                                                                                                      | Low         | 23243217 |
| Colorectal                           | DNA Methylation     | DNMTs            | miR-342                                                                                                                                                                                                        | High        | 18264139 |
|                                      | DNA Methylation     | DNMTs            | miR-124-3p, miR-127                                                                                                                                                                                            | Low         |          |
|                                      | DNA Methylation     | DNMT-1/DNMT-3b   | miR-34b, miR-34c                                                                                                                                                                                               | High        | 18519671 |
|                                      | H3K4me3             | -                | miR-34b, miR-34c                                                                                                                                                                                               | Low         |          |

|                     |       |                                                                                                                                                                                                                                                                                                                                                                                                                                                                                                                                                                                                                  |      |          |
|---------------------|-------|------------------------------------------------------------------------------------------------------------------------------------------------------------------------------------------------------------------------------------------------------------------------------------------------------------------------------------------------------------------------------------------------------------------------------------------------------------------------------------------------------------------------------------------------------------------------------------------------------------------|------|----------|
| DNA Methylation     | DNMTs | miR-9-1, miR-129-2, miR-137                                                                                                                                                                                                                                                                                                                                                                                                                                                                                                                                                                                      | High | 19521961 |
| H3ac                | -     | miR-9-1, miR-129-2, miR-137                                                                                                                                                                                                                                                                                                                                                                                                                                                                                                                                                                                      | High |          |
| DNA Methylation     | DNMTs | miR-137                                                                                                                                                                                                                                                                                                                                                                                                                                                                                                                                                                                                          | High | 20682795 |
| DNA Methylation     | DNMTs | miR-15b, miR-96, miR-99a, miR-106a, miR-129-1, miR-135b, miR-146a, miR-148a, miR-181c, miR-219-1, miR-338                                                                                                                                                                                                                                                                                                                                                                                                                                                                                                        | Low  | 21610744 |
|                     |       | miR-34b, miR-34c                                                                                                                                                                                                                                                                                                                                                                                                                                                                                                                                                                                                 | High |          |
| DNA Methylation     | -     | miR-34b                                                                                                                                                                                                                                                                                                                                                                                                                                                                                                                                                                                                          | Low  | 21636702 |
| DNA Methylation     | DNMTs | miR-345                                                                                                                                                                                                                                                                                                                                                                                                                                                                                                                                                                                                          | High | 21665895 |
| DNA Methylation     | -     | miR-140, miR-142, miR-220b, miR-338, miR-564, miR-663a, miR-939, miR-1234, miR-1180, miR-1203, miR-1224, miR-1225, miR-1226, miR-1227, miR-1228, miR-1229, miR-126, miR-1301, miR-149, miR-200b, miR-203a, miR-339, miR-33b, miR-566, miR-572, miR-596, miR-637, miR-661, miR-671, miR-886, miR-935, miR-937, miR-943, let-7a-3, miR-1306, miR-133a-2, miR-10a, miR-124-1, miR-124-3, miR-127, miR-129-2, miR-137, miR-152, miR-193a, miR-34b, miR-34c, miR-375, miR-9-1, miR-9-3, miR-410, miR-431, miR-433, miR-543, miR-675                                                                                   | Low  | 21698188 |
| DNA Methylation     | DNMTs | miR-1237, miR-1247, miR-1826, miR-219-2, miR-24-1, miR-27b, miR-602, miR-663b, miR-941-1, miR-941-3                                                                                                                                                                                                                                                                                                                                                                                                                                                                                                              | High |          |
| DNA Methylation     | DNMTs | miR-136, miR-142, miR-146a, miR-146b, miR-190a, miR-195, miR-205, miR-211, miR-218-2, miR-337, miR-371a, miR-372, miR-373, miR-431, miR-432, miR-433, miR-486, miR-488, miR-497, miR-885, miR-9-2, miR-944                                                                                                                                                                                                                                                                                                                                                                                                       | Low  |          |
|                     |       | miR-10b, miR-1-1, miR-124-1, miR-124-2, miR-124-3, miR-127, miR-129-1, miR-129-2, miR-133a-2, miR-137, miR-152, miR-153-2, miR-155, miR-193a, miR-196a-1, miR-338, miR-34b, miR-34c, miR-548b, miR-596, miR-598, miR-708, miR-873, miR-876, miR-9-3                                                                                                                                                                                                                                                                                                                                                              | High | 21734013 |
| H3K4me3/H3K79me2    | -     | miR-200b, miR-200a, miR-429, miR-17, miR-18a, miR-19a, miR-20a, miR-19b-1, miR-92a-1, miR-124-1, miR-9-3                                                                                                                                                                                                                                                                                                                                                                                                                                                                                                         | Low  |          |
| Histone Acetylation | HDACs | miR-17, miR-18a, miR-19a, miR-20a, miR-19b-3p, miR-92a-3p, miR-106a, miR-18b, miR-20b                                                                                                                                                                                                                                                                                                                                                                                                                                                                                                                            | Low  | 22308110 |
| DNA Methylation     | DNMTs | miR-1-1, miR-133a-2                                                                                                                                                                                                                                                                                                                                                                                                                                                                                                                                                                                              | High | 22766685 |
|                     |       | miR-149                                                                                                                                                                                                                                                                                                                                                                                                                                                                                                                                                                                                          | High |          |
| DNA Methylation     | DNMTs | let-7e, miR-1184, miR-1201, miR-1205, miR-1228-5p, miR-1247, miR-1249, miR-125a-5p, miR-126-5p, miR-1260a, miR-1274a, miR-1274b, miR-1280, miR-1307, miR-130b-5p, miR-132, miR-148a, miR-149, miR-181a-2, miR-181c, miR-183-3p, miR-193a-5p, miR-21-3p, miR-210, miR-222-5p, miR-26b-3p, miR-27a-5p, miR-31-3p, miR-324-3p, miR-326, miR-331-3p, miR-34a, miR-361-3p, miR-362-3p, miR-365a-3p, miR-376a-1, miR-424, miR-425-3p, miR-449a, miR-454-5p, miR-486-5p, miR-500a, miR-501-3p, miR-502-3p, miR-576-5p, miR-625, miR-628-5p, miR-642a, miR-664a-5p, miR-720, miR-877, miR-92b, miR-93-3p, miR-95, miR-96 | Low  | 22821729 |

|                    |                     |                                     |                                                                                                                                                                                                                                                                                                                                                                                                                                                                                                                                                                                               |          |          |
|--------------------|---------------------|-------------------------------------|-----------------------------------------------------------------------------------------------------------------------------------------------------------------------------------------------------------------------------------------------------------------------------------------------------------------------------------------------------------------------------------------------------------------------------------------------------------------------------------------------------------------------------------------------------------------------------------------------|----------|----------|
| Endometrial        | DNA Methylation     | DNMTs                               | miR-124-3p, miR-34b, miR-34c                                                                                                                                                                                                                                                                                                                                                                                                                                                                                                                                                                  | High     | 22870149 |
|                    | DNA Methylation     | -                                   | miR-34b, miR-34c, miR-9-1                                                                                                                                                                                                                                                                                                                                                                                                                                                                                                                                                                     | Low      | 22989523 |
|                    | DNA Methylation     | DNMTs                               | miR-129-2                                                                                                                                                                                                                                                                                                                                                                                                                                                                                                                                                                                     | High     | 19887623 |
|                    | DNA Methylation     | -                                   | miR-9-1, miR-9-2, miR-9-3, miR-149                                                                                                                                                                                                                                                                                                                                                                                                                                                                                                                                                            | Low      | 21868754 |
|                    | DNA Methylation     | DNMT-1                              | miR-152                                                                                                                                                                                                                                                                                                                                                                                                                                                                                                                                                                                       | High     |          |
|                    | DNA Methylation     | -                                   | miR-34b                                                                                                                                                                                                                                                                                                                                                                                                                                                                                                                                                                                       | High     | 22052540 |
| Epithelial ovarian | DNA Methylation     | DNMTs                               | miR-127, miR-337, miR-432, miR-495, miR-376c, miR-376a-1, miR-376b, miR-377, miR-410, miR-520e, miR-519e, miR-519d, miR-516a-1, miR-518a-3p, miR-372, miR-448, miR-507, miR-424, miR-514a-3p, miR-15a, miR-184, miR-34a, miR-34b, miR-95, miR-182                                                                                                                                                                                                                                                                                                                                             | Low      | 18458333 |
|                    | Histone Acetylation | HDACs                               | miR-127, miR-337, miR-432, miR-495, miR-376c, miR-376a-1, miR-376b, miR-377, miR-410, miR-520e, miR-519e, miR-519d, miR-516a-1, miR-518a-3p, miR-372, miR-448, miR-507, miR-424, miR-514a-3p, miR-15a, miR-184, miR-34a, miR-34b, miR-95, miR-182                                                                                                                                                                                                                                                                                                                                             |          |          |
| Gastric            | DNA Methylation     | -                                   | miR-124-1, miR-124-2, miR-124-3                                                                                                                                                                                                                                                                                                                                                                                                                                                                                                                                                               | Low      | 19165869 |
|                    | DNA Methylation     | DNMTs                               | miR-512-5p, miR-517b, miR-526b, miR-518b, miR-515-5p                                                                                                                                                                                                                                                                                                                                                                                                                                                                                                                                          | Low      | 19503096 |
|                    | Histone Acetylation | HDACs                               | miR-517b, miR-526b, miR-518b, miR-515-5p                                                                                                                                                                                                                                                                                                                                                                                                                                                                                                                                                      | Low      |          |
|                    | H3ac/H3K4me         | HDACs                               | miR-512-5p                                                                                                                                                                                                                                                                                                                                                                                                                                                                                                                                                                                    | High     | 20080834 |
|                    | DNA Methylation     | DNMTs                               | miR-211, miR-432, miR-495, miR-9-1, miR-9-2, miR-9-3                                                                                                                                                                                                                                                                                                                                                                                                                                                                                                                                          |          |          |
|                    | DNA Methylation     | DNMTs                               | miR-181c                                                                                                                                                                                                                                                                                                                                                                                                                                                                                                                                                                                      | High     | 20331975 |
|                    | DNA Methylation     | DNMTs                               | miR-129-2                                                                                                                                                                                                                                                                                                                                                                                                                                                                                                                                                                                     | High     | 20662076 |
|                    | DNA Methylation     | DNMTs                               | miR-196b                                                                                                                                                                                                                                                                                                                                                                                                                                                                                                                                                                                      | High     |          |
|                    | DNA Methylation     | DNMTs                               | miR-142-5p, miR-193a, miR-195, miR-196a-5p, miR-34b, miR-34c, miR-375, miR-498, miR-512-3p, miR-512-5p, miR-515-3p, miR-515-5p, miR-516b-3p, miR-516b-5p, miR-517a, miR-517b, miR-517c, miR-518a-3p, miR-518b, miR-518c, miR-518d, miR-518e, miR-518f, miR-519b, miR-519c, miR-519d, miR-519e, miR-520a, miR-520b, miR-520c, miR-520d, miR-520e, miR-520f, miR-520g, miR-520h, miR-521, miR-522, miR-523, miR-524, miR-525, miR-526a, miR-526b, miR-519c-5p, miR-527, miR-602, miR-9-5p, miR-518c-5p, miR-518f-5p, miR-519e-5p, miR-520a-5p, miR-520d-5p, miR-524-5p, miR-526b-3p, miR-517-5p | Low      | 20924086 |
|                    | DNA Methylation     | DNMTs                               | miR-34b, miR-34c                                                                                                                                                                                                                                                                                                                                                                                                                                                                                                                                                                              | High     |          |
| DNA Methylation    | DNMTs               | miR-212                             | High                                                                                                                                                                                                                                                                                                                                                                                                                                                                                                                                                                                          | 21053104 |          |
| DNA Methylation    | -                   | miR-137                             | Low                                                                                                                                                                                                                                                                                                                                                                                                                                                                                                                                                                                           | 21221794 |          |
| DNA Methylation    | -                   | miR-124-3p                          | Low                                                                                                                                                                                                                                                                                                                                                                                                                                                                                                                                                                                           | 21365509 |          |
| DNA Methylation    | -                   | miR-10a, miR-34b, miR-34c, miR-196b | Low                                                                                                                                                                                                                                                                                                                                                                                                                                                                                                                                                                                           | 21562367 |          |
| DNA Methylation    | DNMTs               | miR-10b                             | High                                                                                                                                                                                                                                                                                                                                                                                                                                                                                                                                                                                          |          |          |
| DNA Methylation    | -                   | miR-34b, miR-34c, miR-124-3p        | Low                                                                                                                                                                                                                                                                                                                                                                                                                                                                                                                                                                                           | 21914401 |          |
| DNA Methylation    | DNMTs               | miR-139                             | High                                                                                                                                                                                                                                                                                                                                                                                                                                                                                                                                                                                          | 21925125 |          |
| H3K9ac             | HER2                |                                     |                                                                                                                                                                                                                                                                                                                                                                                                                                                                                                                                                                                               |          |          |
| DNA Methylation    | DNMTs               | miR-9-1, miR-9-2, miR-9-3           | High                                                                                                                                                                                                                                                                                                                                                                                                                                                                                                                                                                                          | 21931274 |          |

|                                        |                     |                                                                                 |                                                                                                |          |          |
|----------------------------------------|---------------------|---------------------------------------------------------------------------------|------------------------------------------------------------------------------------------------|----------|----------|
| Glioblastoma                           | DNA Methylation     | DNMTs                                                                           | miR-25-5p, miR-127-3p, miR-193a-5p, miR-378a, miR-409, miR-570, miR-767                        | Low      | 21960261 |
|                                        |                     |                                                                                 | miR-34b, miR-129-2-3p                                                                          | High     |          |
|                                        | Histone Acetylation | HDACs                                                                           | miR-34b, miR-129-2-3p, miR-25-5p, miR-127-3p, miR-193a-5p, miR-378a, miR-409, miR-570, miR-767 | Low      |          |
|                                        | DNA Methylation     | DNMT-1                                                                          | miR-148a                                                                                       | High     | 22167392 |
|                                        | DNA Methylation     | DNMTs                                                                           | miR-155                                                                                        | Low      | 22426647 |
|                                        | DNA Methylation     | DNMTs                                                                           | miR-9-5p                                                                                       | Low      | 22906743 |
|                                        | H3ac/H3K4me         | HDACs                                                                           |                                                                                                |          |          |
|                                        | DNA Methylation     | DNMTs                                                                           | miR-378a                                                                                       | High     | 23333942 |
|                                        | DNA Methylation     | DNMTs                                                                           | miR-137                                                                                        | Low      | 18577219 |
|                                        | DNA Methylation     | DNMTs                                                                           | miR-211                                                                                        | High     | 23183822 |
| Hepatocellular carcinoma               | DNA Methylation     | DNMTs                                                                           | miR-7-5p, miR-27b, miR-196a-5p, miR-424, miR-496, miR-197, miR-101-3p                          | Low      | 18593903 |
|                                        | DNA Methylation     | DNMT-1                                                                          | miR-1                                                                                          | High     |          |
|                                        | Histone Acetylation | HDACs                                                                           | miR-1, miR-7-5p, miR-27b, miR-196a-5p, miR-424, miR-496, miR-197, miR-101-3p                   | Low      |          |
|                                        | DNA Methylation     | -                                                                               | miR-409, miR-564, miR-410, miR-219-2, miR-24-1, miR-126, miR-369, miR-412, miR-339             | Low      | 19843643 |
|                                        | DNA Methylation     | DNMTs                                                                           | miR-124-3p, miR-203a, miR-375                                                                  | High     |          |
|                                        | DNA Methylation     | DNMTs                                                                           | miR-125b-5p                                                                                    | High     | 21703189 |
|                                        | H3ac                | HDAC4/SP1                                                                       | miR-200a                                                                                       | High     | 21837748 |
|                                        | DNA Methylation     | DNMTs                                                                           | miR-191                                                                                        | High     | 21969817 |
|                                        | DNA Methylation     | DNMTs                                                                           | miR-520e                                                                                       | High     | 22105365 |
|                                        | DNA Methylation     | RNAPII                                                                          | miR-122                                                                                        | Low      | 22140464 |
|                                        | H3K9ac/H3K14ac      | HDAC1/HDAC3/EP300                                                               | miR-224, miR-452                                                                               | High     | 22459148 |
|                                        | DNA Methylation     | -                                                                               | miR-10a, miR-10b, miR-196b                                                                     | Low      | 22976466 |
|                                        | DNA Methylation     | DNMTs                                                                           | miR-125b-5p<br>miR-125a-5p                                                                     | High     | 23079745 |
|                                        | DNA Methylation     | DNMTs                                                                           | miR-512-3p, miR-517a, miR-518c, miR-519d, miR-520c-3p, miR-521, miR-517c                       | Low      | 3142219  |
|                                        | Histone Acetylation | HDACs                                                                           |                                                                                                |          |          |
|                                        | DNA Methylation     | -                                                                               | let-7b, miR-122, miR-149, miR-200b                                                             | Low      | 23229728 |
|                                        | DNA Methylation     | DNMTs                                                                           | miR-335, miR-101-2, miR-146b, miR-497                                                          | High     | 23229728 |
| DNA Methylation                        | DNMT-1              | miR-9-2, miR-9-3, miR-124-1, miR-124-2, miR-124-3, miR-129-2, miR-596, miR-1247 | High                                                                                           | 23364900 |          |
| H3K27me3                               | -                   | miRNA biogenesis genes                                                          | High                                                                                           | 23398123 |          |
| DNA Methylation                        | -                   | miR-124-3p, miR-203a                                                            | Low                                                                                            | 23487440 |          |
| Resistance of Hepatocellular carcinoma | DNA Methylation     | DNMTs                                                                           | miR-193a-3p                                                                                    | High     | 22117060 |

|                               |                         |                                                                                                  |                                                                                                                                                                                                                                                                                                                                                               |                                                                                                                        |          |
|-------------------------------|-------------------------|--------------------------------------------------------------------------------------------------|---------------------------------------------------------------------------------------------------------------------------------------------------------------------------------------------------------------------------------------------------------------------------------------------------------------------------------------------------------------|------------------------------------------------------------------------------------------------------------------------|----------|
| Liver cancer metastasis       | H3K27me3                | EZH2                                                                                             | miR-139-5p, miR-125b-5p, miR-200b, let-7c, miR-101-3p                                                                                                                                                                                                                                                                                                         | Low                                                                                                                    | 22370893 |
| Lung cancer                   | DNA Methylation         | DNMT-1/DNMT-3B                                                                                   | let-7a-3                                                                                                                                                                                                                                                                                                                                                      | High                                                                                                                   | 17308078 |
|                               | H3K27me3/H3K9me2/H3K9ac | EZH2/G9a/HDAC                                                                                    | miR-212                                                                                                                                                                                                                                                                                                                                                       | High                                                                                                                   | 22110741 |
|                               | DNA Methylation         | -                                                                                                | miR-9-1, miR-34b, miR-34c, miR-9-3, miR-193a                                                                                                                                                                                                                                                                                                                  | Low                                                                                                                    | 23156677 |
|                               | DNA Methylation         | -                                                                                                | miR-135b                                                                                                                                                                                                                                                                                                                                                      | Low                                                                                                                    | 23695671 |
| Non-small cell lung carcinoma | DNA Methylation         | -                                                                                                | miR-34a                                                                                                                                                                                                                                                                                                                                                       | Low                                                                                                                    | 19736307 |
|                               | DNA Methylation         | DNMTs                                                                                            | miR-200c                                                                                                                                                                                                                                                                                                                                                      | High                                                                                                                   | 20696752 |
|                               | DNA Methylation         | -                                                                                                | miR-34b, miR-34c                                                                                                                                                                                                                                                                                                                                              | Low                                                                                                                    | 21383543 |
|                               | DNA Methylation         | DNMTs                                                                                            | miR-375, miR-196b, miR-127, miR-203a, miR-148a, miR-181c, miR-30e, miR-449a, miR-340, miR-486, miR-483, miR-150                                                                                                                                                                                                                                               | Low                                                                                                                    | 21702040 |
|                               | DNA Methylation         | -                                                                                                | miR-34b, miR-126                                                                                                                                                                                                                                                                                                                                              | High                                                                                                                   |          |
|                               | DNA Methylation         | -                                                                                                | miR-152, miR-9-3, miR-124-1, miR-124-2, miR-124-3                                                                                                                                                                                                                                                                                                             | Low                                                                                                                    | 21917081 |
|                               | DNA Methylation         | DNMTs                                                                                            | miR-7-5p, miR-9-5p, miR-22, miR-29c, miR-30c-2, miR-33b, miR-34a, miR-92b, miR-99b, miR-125a, miR-127, miR-132, miR-140, miR-183, miR-193a, miR-194-1, miR-200c, miR-210, miR-375, miR-382, miR-423, miR-424, miR-432, miR-454, miR-455, miR-486, miR-487b, miR-494, miR-495, miR-720, miR-1180, miR-1203, miR-1323                                           | Low                                                                                                                    | 22282464 |
|                               | DNA Methylation         | DNMTs                                                                                            | miR-196a-5p                                                                                                                                                                                                                                                                                                                                                   | High                                                                                                                   | 22876840 |
|                               | DNA Methylation         | DNMTs                                                                                            | miR-34a, miR-34b, miR-34c                                                                                                                                                                                                                                                                                                                                     | High                                                                                                                   | 22047961 |
|                               | Small cell lung cancer  | DNA Methylation                                                                                  | DNMTs                                                                                                                                                                                                                                                                                                                                                         | miR-34b, miR-489, miR-132, miR-142-3p, miR-200a, miR-145, miR-452, miR-21, miR-34c, miR-496, let-7e, miR-654, miR-519b | Low      |
| DNA Methylation               |                         | DNMTs                                                                                            | miR-375                                                                                                                                                                                                                                                                                                                                                       | High                                                                                                                   | 21723283 |
| Histone Acetylation           |                         | HDACs                                                                                            | miR-375, miR-34b, miR-489, miR-132, miR-142-3p, miR-200a, miR-145, miR-452, miR-21, miR-34c, miR-496, let-7e, miR-654, miR-519b                                                                                                                                                                                                                               | Low                                                                                                                    |          |
| DNA Methylation               |                         | DNMTs                                                                                            | miR-34b, miR-489, miR-375, miR-132, miR-142-3p, miR-200a, miR-145, miR-452, miR-21, miR-34c, miR-496, let-7e, miR-654, miR-519b                                                                                                                                                                                                                               | Low                                                                                                                    | 21949788 |
| DNA Methylation               |                         | DNMTs                                                                                            | miR-34b                                                                                                                                                                                                                                                                                                                                                       | High                                                                                                                   |          |
| DNA Methylation               |                         | DNMTs                                                                                            | miR-376a-1                                                                                                                                                                                                                                                                                                                                                    | Low                                                                                                                    |          |
| H3ac                          |                         | HDACs                                                                                            | miR-376c                                                                                                                                                                                                                                                                                                                                                      | Low                                                                                                                    | 22747855 |
| H3ac                          |                         | -                                                                                                | miR-376a-1                                                                                                                                                                                                                                                                                                                                                    | High                                                                                                                   |          |
| DNA Methylation               |                         | DNMTs                                                                                            | miR-212, miR-142-3p, miR-29b-1, miR-29b-2, miR-132-5p, miR-21, miR-222, miR-132, miR-21-3p, miR-100, miR-29b-1-5p, miR-29c, miR-30b-3p, miR-29a-5p, miR-155, miR-193a-5p, miR-194-1, miR-194-2, miR-26a-1, miR-26a-2, miR-331-3p, miR-363, miR-425, miR-215, miR-22, miR-30b, miR-140-3p, miR-190a, miR-224, miR-30c-1, miR-30c-2, miR-320a, miR-424, miR-99b | Low                                                                                                                    | 22752337 |
| DNA Methylation               |                         | -                                                                                                | miR-34a, miR-602                                                                                                                                                                                                                                                                                                                                              | Low                                                                                                                    |          |
| DNA Methylation               | DNMTs                   | miR-182, miR-886-3p, miR-886-5p, miR-371a-5p, miR-146b-5p, miR-335, miR-424-3p, miR-412, miR-503 | High                                                                                                                                                                                                                                                                                                                                                          |                                                                                                                        |          |

|                                        |                     |        |                                                                                                                                                                                                                                                                                                                                                                                                                                          |      |          |
|----------------------------------------|---------------------|--------|------------------------------------------------------------------------------------------------------------------------------------------------------------------------------------------------------------------------------------------------------------------------------------------------------------------------------------------------------------------------------------------------------------------------------------------|------|----------|
|                                        | Histone Acetylation | HDACs  | miR-182, miR-100, miR-132-5p, miR-140-3p, miR-142-3p, miR-146b-5p, miR-155, miR-190a, miR-193a-5p, miR-194-1, miR-194-2, miR-21-3p, miR-212, miR-215, miR-22, miR-222, miR-224, miR-26a-1, miR-26a-2, miR-29a-5p, miR-29b-1, miR-29b-1-5p, miR-29b-2, miR-29c, miR-30b-3p, miR-30c-1, miR-30c-2, miR-320a, miR-331-3p, miR-335, miR-363, miR-371a-5p, miR-412, miR-424-3p, miR-425, miR-485-3p, miR-503, miR-886-3p, miR-886-5p, miR-99b | Low  |          |
|                                        | DNA Methylation     | EZH2   | miR-31                                                                                                                                                                                                                                                                                                                                                                                                                                   | High | 22948084 |
|                                        | DNA Methylation     | DNMTs  | miR-18b                                                                                                                                                                                                                                                                                                                                                                                                                                  | High | 23365201 |
| Multiple myeloma                       | DNA Methylation     | DNMTs  | miR-203a                                                                                                                                                                                                                                                                                                                                                                                                                                 | High | 21707582 |
|                                        | DNA Methylation     | DNMTs  | miR-34b, miR-34c                                                                                                                                                                                                                                                                                                                                                                                                                         | High | 21976676 |
| Nasopharyngeal carcinoma               | DNA Methylation     | DNMTs  | let-7a-1                                                                                                                                                                                                                                                                                                                                                                                                                                 | Low  | 20440510 |
|                                        | DNA Methylation     | -      | miR-200b                                                                                                                                                                                                                                                                                                                                                                                                                                 | Low  | 20574809 |
|                                        | DNA Methylation     | -      | miR-330, miR-27b, miR-23b, miR-24-1, miR-29b-2, miR-542, miR-381, miR-337, miR-154, miR-497, miR-191, miR-219-1, miR-196a-2, let-7i, miR-326, let-7f-1, let-7a-1, let-7a-3, miR-509-1, miR-509-3, miR-151a, miR-15b, miR-214, miR-10b, miR-639, miR-548a-3, miR-645, miR-181c, miR-218-1, miR-650, miR-218-2, miR-520d, miR-153-2, miR-153-1, miR-375, miR-7-3, miR-148a, miR-597                                                        | Low  | 22797059 |
|                                        | DNA Methylation     | DNMTs  | miR-140, miR-455, miR-29c, miR-126, miR-195, miR-10a, miR-425, miR-142, let-7e, miR-129-2, miR-26b, miR-101-1, miR-7a, miR-24-2, miR-203a, miR-1-1, miR-365b, miR-9-1, miR-641, miR-335, miR-184, miR-9-3, miR-296, miR-135a-1, miR-372, miR-149, miR-26a-2, miR-139, miR-340                                                                                                                                                            | High |          |
|                                        | DNA Methylation     | -      | miR-375                                                                                                                                                                                                                                                                                                                                                                                                                                  | Low  | 21533613 |
| Oesophageal cancer                     | DNA Methylation     | DNMTs  | miR-34a, miR-34b, miR-34c, miR-129-2                                                                                                                                                                                                                                                                                                                                                                                                     | High | 21547903 |
|                                        | DNA Methylation     | DNMTs  | miR-10a                                                                                                                                                                                                                                                                                                                                                                                                                                  | Low  | 22966337 |
|                                        | DNA Methylation     | DNMTs  | miR-132, miR-34b, miR-137, miR-193a, miR-203a                                                                                                                                                                                                                                                                                                                                                                                            | High | 18381414 |
|                                        | DNA Methylation     | -      | miR-375, miR-383, miR-483, miR-489, miR-500a                                                                                                                                                                                                                                                                                                                                                                                             | Low  | 21795477 |
| Oral cancer                            | DNA Methylation     | DNMTs  | miR-218-5p, miR-585                                                                                                                                                                                                                                                                                                                                                                                                                      | High |          |
|                                        | DNA Methylation     | DNMTs  | miR-127, miR-137, miR-200a, miR-200b, miR-429, miR-200c, miR-141, miR-205                                                                                                                                                                                                                                                                                                                                                                | High | 22132151 |
|                                        | DNA Methylation     | -      | miR-596                                                                                                                                                                                                                                                                                                                                                                                                                                  |      | 23233740 |
| Osteosarcoma                           | H3ac                | HDACs  | miR-127, miR-411, miR-431, miR-432                                                                                                                                                                                                                                                                                                                                                                                                       | High | 22957032 |
|                                        | DNA Methylation     | DNMTs  | let-7a-3                                                                                                                                                                                                                                                                                                                                                                                                                                 | High | 17974952 |
| Ovarian                                | DNA Methylation     | -      | miR-34a                                                                                                                                                                                                                                                                                                                                                                                                                                  | Low  | 20145172 |
|                                        | DNA Methylation     | DNMT-1 | miR-199a-1, miR-125b-1                                                                                                                                                                                                                                                                                                                                                                                                                   | High | 23146892 |
| Multidrug resistance of ovarian cancer | DNA Methylation     | DNMTs  | miR-130b                                                                                                                                                                                                                                                                                                                                                                                                                                 | High | 22005523 |
|                                        | DNA Methylation     | DNMTs  | miR-29a, miR-29b-3p, miR-103a-3p, miR-320a                                                                                                                                                                                                                                                                                                                                                                                               | Low  |          |
| Pancreatic cancer                      | DNA Methylation     | DNMTs  | miR-107                                                                                                                                                                                                                                                                                                                                                                                                                                  | High | 19407485 |



|                 |                     |       |                                                                                                                                                                                                                                                                                                                                                                                                                                                                                                                                                    |      |          |
|-----------------|---------------------|-------|----------------------------------------------------------------------------------------------------------------------------------------------------------------------------------------------------------------------------------------------------------------------------------------------------------------------------------------------------------------------------------------------------------------------------------------------------------------------------------------------------------------------------------------------------|------|----------|
|                 | Histone Acetylation | HDACs | miR-107, miR-29a, miR-29b-3p, miR-103a-3p, miR-320a                                                                                                                                                                                                                                                                                                                                                                                                                                                                                                | Low  |          |
|                 | DNA Methylation     | -     | miR-148a                                                                                                                                                                                                                                                                                                                                                                                                                                                                                                                                           | Low  | 20431052 |
|                 | DNA Methylation     | DNMTs | miR-200a, miR-200b                                                                                                                                                                                                                                                                                                                                                                                                                                                                                                                                 | High | 20551052 |
|                 | DNA Methylation     | DNMTs | miR-132                                                                                                                                                                                                                                                                                                                                                                                                                                                                                                                                            | High | 21665894 |
|                 | DNA Methylation     | DNMTs | miR-34a                                                                                                                                                                                                                                                                                                                                                                                                                                                                                                                                            | Low  | 21909380 |
|                 | Histone Acetylation | HDACs |                                                                                                                                                                                                                                                                                                                                                                                                                                                                                                                                                    |      |          |
|                 | DNA Methylation     | DNMTs | miR-124-1, miR-124-2, miR-124-3                                                                                                                                                                                                                                                                                                                                                                                                                                                                                                                    | High | 23334332 |
|                 | DNA Methylation     | DNMTs | miR-126                                                                                                                                                                                                                                                                                                                                                                                                                                                                                                                                            | High | 19116145 |
|                 | H3ac                | HDAC2 |                                                                                                                                                                                                                                                                                                                                                                                                                                                                                                                                                    |      |          |
|                 | DNA Methylation     | DNMTs | miR-9-1, miR-9-2, miR-9-3, miR-27a, miR-32, miR-33a, miR-34a, miR-132, miR-149, miR-183, miR-188, miR-192, miR-193b, miR-194-1, miR-194-2, miR-203a, miR-215, miR-218-1, miR-218-2, miR-370, miR-375, miR-376a-1, miR-376a-2, miR-449a, miR-487b, miR-512-1, miR-512-2, miR-513a-1, miR-513a-2, miR-515-1, miR-515-2, miR-517a, miR-517b, miR-517c, miR-518b, miR-520f, miR-526a-1, miR-526a-2, miR-572, miR-601, miR-629, miR-630, miR-638, miR-663a, miR-765                                                                                     | Low  |          |
|                 |                     |       | miR-193b                                                                                                                                                                                                                                                                                                                                                                                                                                                                                                                                           | High | 20073067 |
|                 | Histone Acetylation | HDACs | miR-193b, miR-9-1, miR-9-2, miR-9-3, miR-27a, miR-32, miR-33a, miR-34a, miR-132, miR-149, miR-183, miR-188, miR-192, miR-193b, miR-194-1, miR-194-2, miR-203a, miR-215, miR-218-1, miR-218-2, miR-370, miR-375, miR-376a-1, miR-376a-2, miR-449a, miR-487b, miR-512-1, miR-512-2, miR-513a-1, miR-513a-2, miR-515-1, miR-515-2, miR-517a, miR-517b, miR-517c, miR-518b, miR-520f, miR-526a-1, miR-526a-2, miR-572, miR-601, miR-629, miR-630, miR-638, miR-663a, miR-765                                                                           | Low  |          |
| Prostate cancer | DNA Methylation     | -     | miR-145                                                                                                                                                                                                                                                                                                                                                                                                                                                                                                                                            | Low  | 20588276 |
|                 | DNA Methylation     | DNMTs | miR-145                                                                                                                                                                                                                                                                                                                                                                                                                                                                                                                                            | High | 21349819 |
|                 | DNA Methylation     | DNMTs | miR-205                                                                                                                                                                                                                                                                                                                                                                                                                                                                                                                                            | High | 21368878 |
|                 | DNA Methylation     | DNMTs | let-7g-3p, let-7i-3p, miR-10a-3p, miR-106b-3p, miR-132, miR-146b-5p, miR-148a, miR-15b-3p, miR-152, miR-17, miR-17-3p, miR-18a, miR-18b, miR-19a, miR-19a-5p, miR-19b-3p, miR-19b-1-5p, miR-181c, miR-193b, miR-193b-5p, miR-199b-5p, miR-212, miR-219-1-3p, miR-20a-3p, miR-20b-3p, miR-203a, miR-22, miR-25-5p, miR-330-5p, miR-363, miR-375, miR-449b, miR-497, miR-483-5p, miR-503, miR-542-5p, miR-548b-5p, miR-550a-3p, miR-564, miR-615-5p, miR-616, miR-627, miR-636, miR-641, miR-642a, miR-9-3p, miR-935, miR-937, miR-92a-1-5p, miR-941 | Low  | 22310291 |
|                 | DNA Methylation     | DNMTs | miR-132, miR-127, miR-146b-3p, miR-18a-3p, miR-330-3p, miR-34b, miR-34c, miR-376a-1, miR-376c, miR-409-3p, miR-410, miR-411, miR-432, miR-432-3p, miR-485-3p, miR-487b, miR-450a-5p, miR-539, miR-542-3p, miR-589, miR-655                                                                                                                                                                                                                                                                                                                         | High |          |
|                 | DNA Methylation     | DNMTs | miR-29a, miR-1256                                                                                                                                                                                                                                                                                                                                                                                                                                                                                                                                  | High | 22805767 |

|                   |                 |                   |             |      |          |
|-------------------|-----------------|-------------------|-------------|------|----------|
|                   | DNA Methylation | DNMTs             | miR-205     | High | 22869146 |
|                   | DNA Methylation | DNMTs             | miR-124-3p  | High | 23069658 |
|                   | DNA Methylation | DNMTs             | miR-23b     | High | 23074286 |
|                   | H3ac            | -                 | miR-21      | Low  | 20890304 |
|                   | H3K4me3         | HDAC1/HDAC2/HDAC4 | miR-34b     | Low  | 23147995 |
|                   | DNA Methylation | -                 | miR-31      | Low  | 23233736 |
| Testicular cancer | DNA Methylation | -                 | miR-199a-5p | Low  | 21383689 |

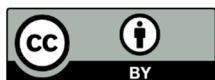

© 2020 by the authors. Licensee MDPI, Basel, Switzerland. This article is an open access article distributed under the terms and conditions of the Creative Commons Attribution (CC BY) license (<http://creativecommons.org/licenses/by/4.0/>).
